# Supplementary material for: Nuclear movement regulated by non-Smad Nodal signaling via JNK is associated with Smad signaling during zebrafish endoderm specification
Source: Oxford University Press journal article supplement (doi:10.1242/dev.151746), 2017-01-01
Supplement: dev151746supp.pdf [file dev151746supp.pdf]

## Figure S1

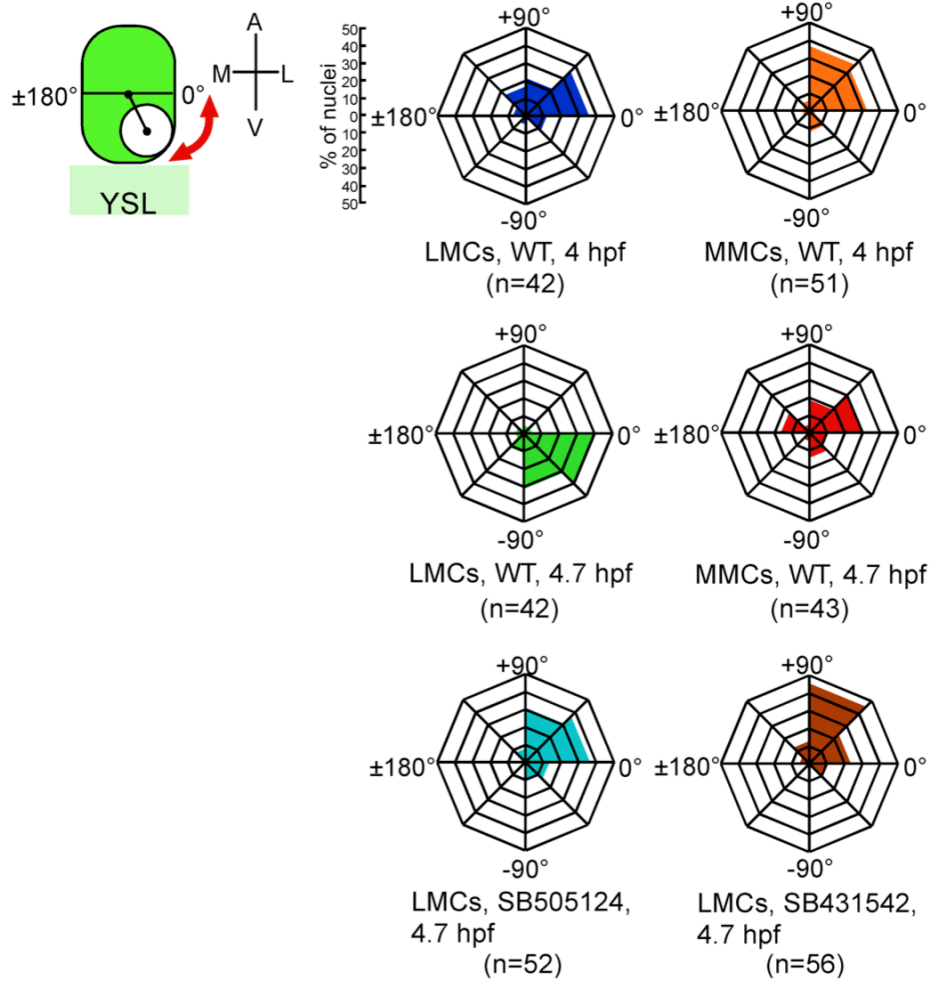

**Figure S1. Nuclear positional changes in LMCs and MMCs between 4.0 and 4.7**

**hpf**

Angles between the center of the cell and the nucleus relative to the medial-lateral axis

were measured (red line). n = number of nuclei examined.

## Figure S2

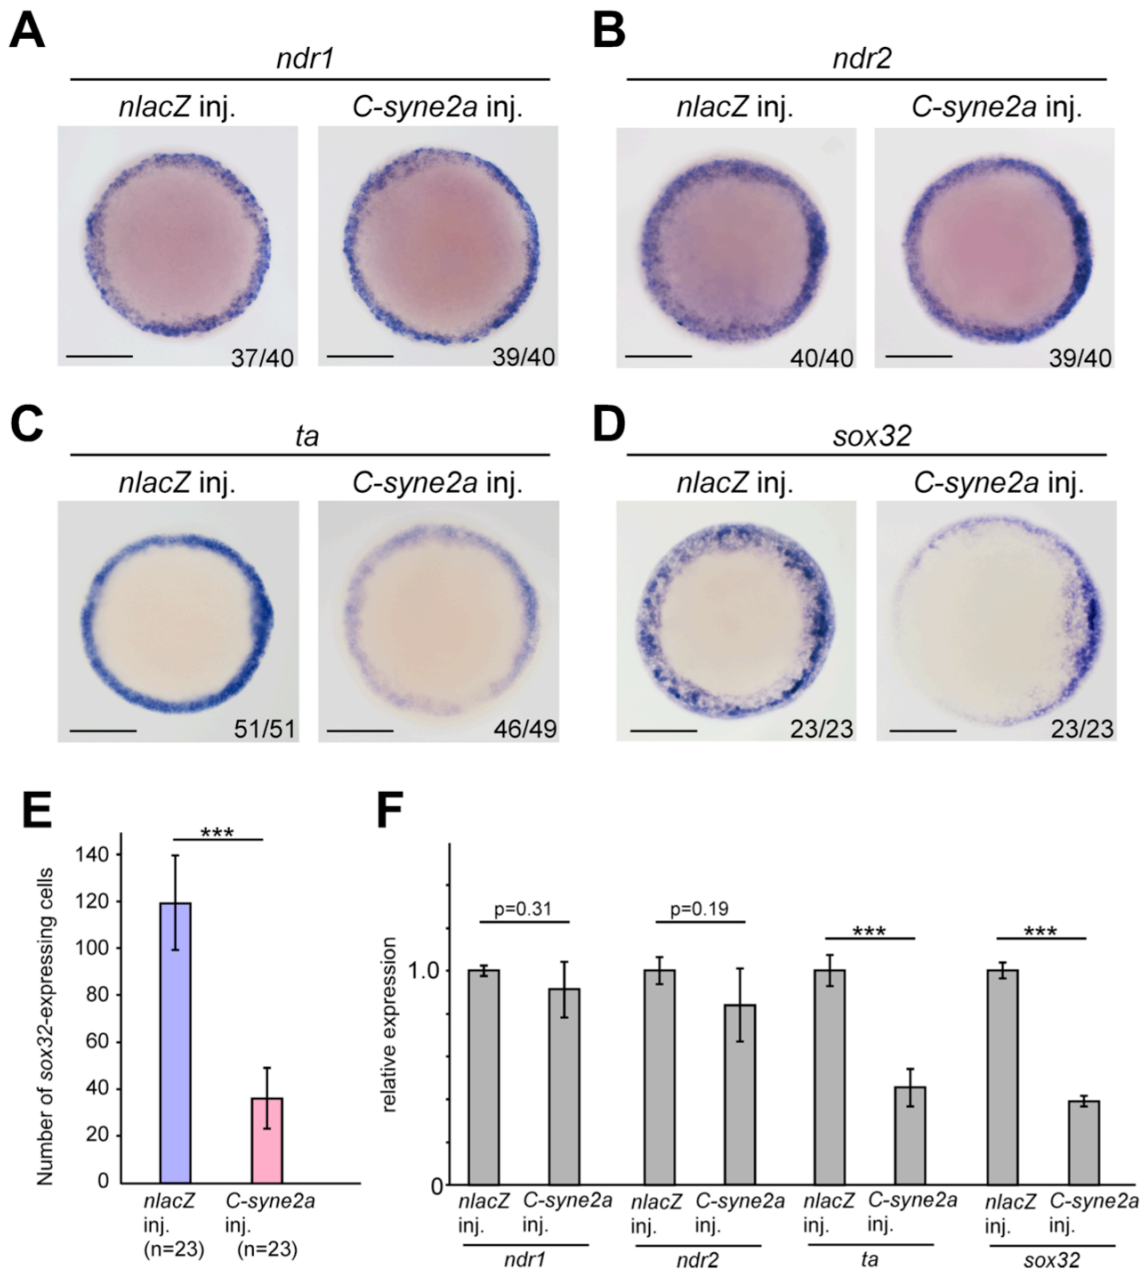

**Figure S2. Expression of *ndr*, mesoderm, and endoderm genes in**

### *C-syne2a*-overexpressing embryos

(A-D) Expression of *ndr1*, *ndr2*, *ta*, and *sox32* was examined by WISH in *nlacZ* or

*C-syne2a* mRNA overexpressing embryos at 5.3 hpf. The number of embryos

examined is shown at the lower right corner of each panel. Animal pole views. Scale

bars: 200  $\mu\text{m}$ . (E) Number of *sox32*-expressing endodermal cells in *nlacZ*- or *C-syne2a*-overexpressing embryos at 5.3 hpf. n = number of embryos examined.

\*\*\* $p < 0.001$ . (F) Expression of *ndr1*, *ndr2*, *ta*, and *sox32* was examined by qPCR in *nlacZ* or *C-syne2a* mRNA-overexpressing embryos at 5.3 hpf. Error bars represent standard deviations of three or four independent experiments. \*\*\* $p < 0.001$ .

### Figure S3

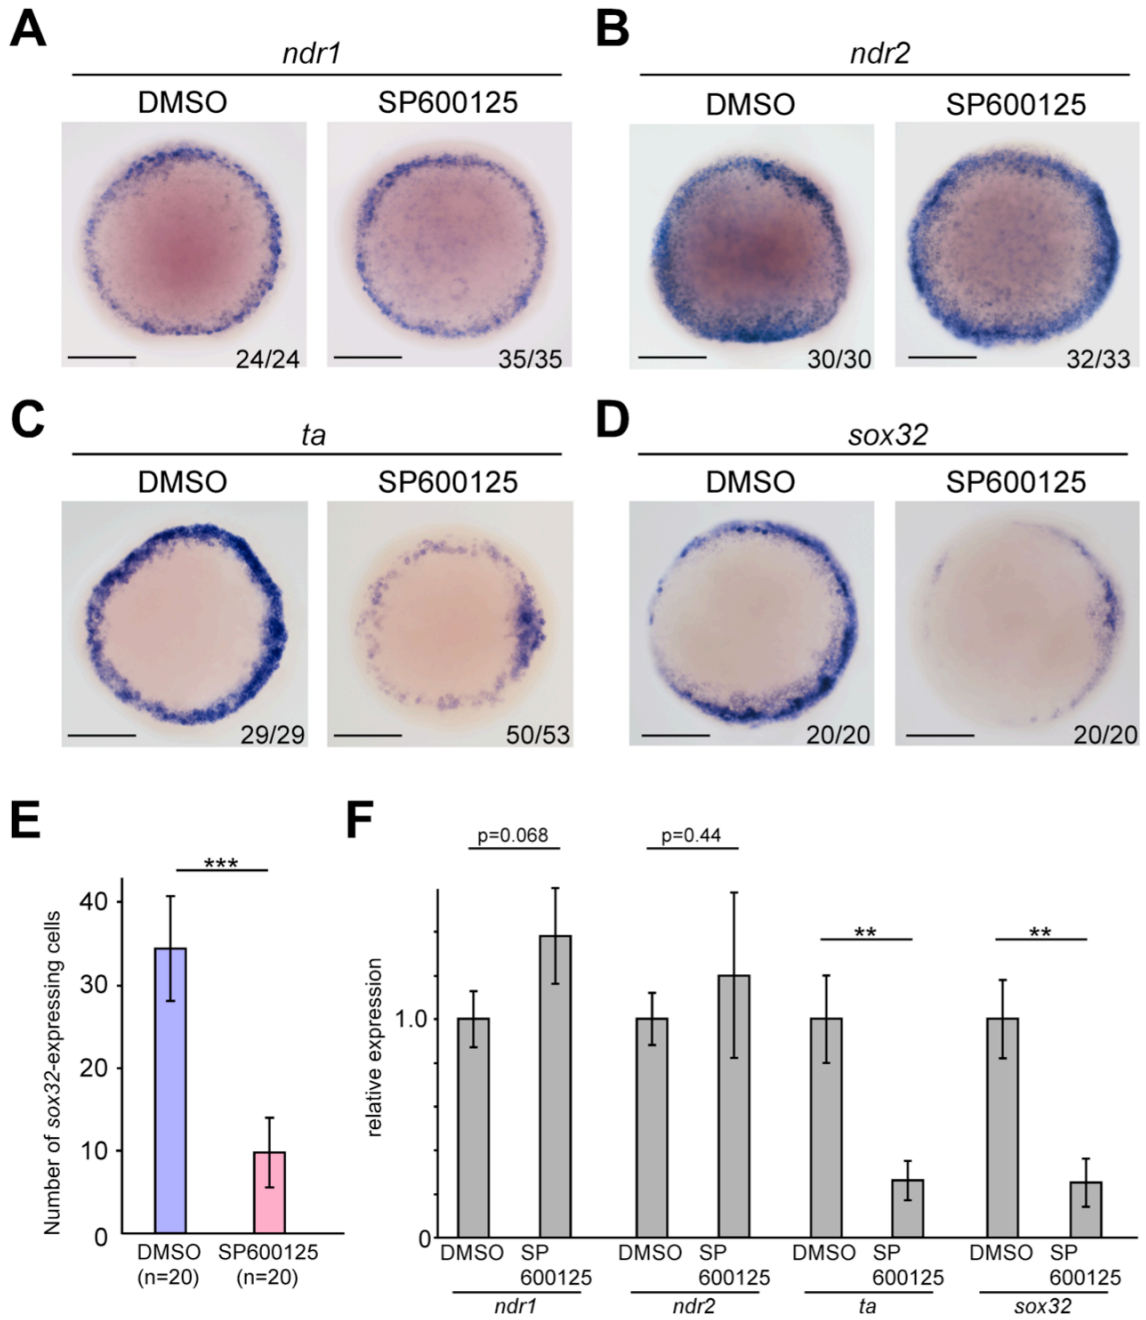

**Figure S3. Expression of *ndr*, mesoderm, and endoderm genes in SP600125-treated embryos**

(A-D) Expression of *ndr1*, *ndr2*, *ta*, and *sox32* was examined by whole-mount *in situ*

hybridization in DMSO- or SP600125-treated embryos at 4.7 hpf. Number of embryos

examined is shown at the lower right corner of each panel. Animal pole views. Scale bars: 200  $\mu\text{m}$ . (E) Number of *sox32*-expressing endodermal cell was counted in DMSO-, or SP600125-treated embryos.  $n$  = number of embryos examined.  $***p < 0.001$ . (F) Expression of *ndr1*, *ndr2*, *ta*, and *sox32* was examined by qPCR in DMSO- or SP600125-treated embryos at 4.7 hpf. Error bars represent standard deviations of three or four independent experiments.  $***p < 0.001$ .  $**p < 0.05$ .

## Figure S4

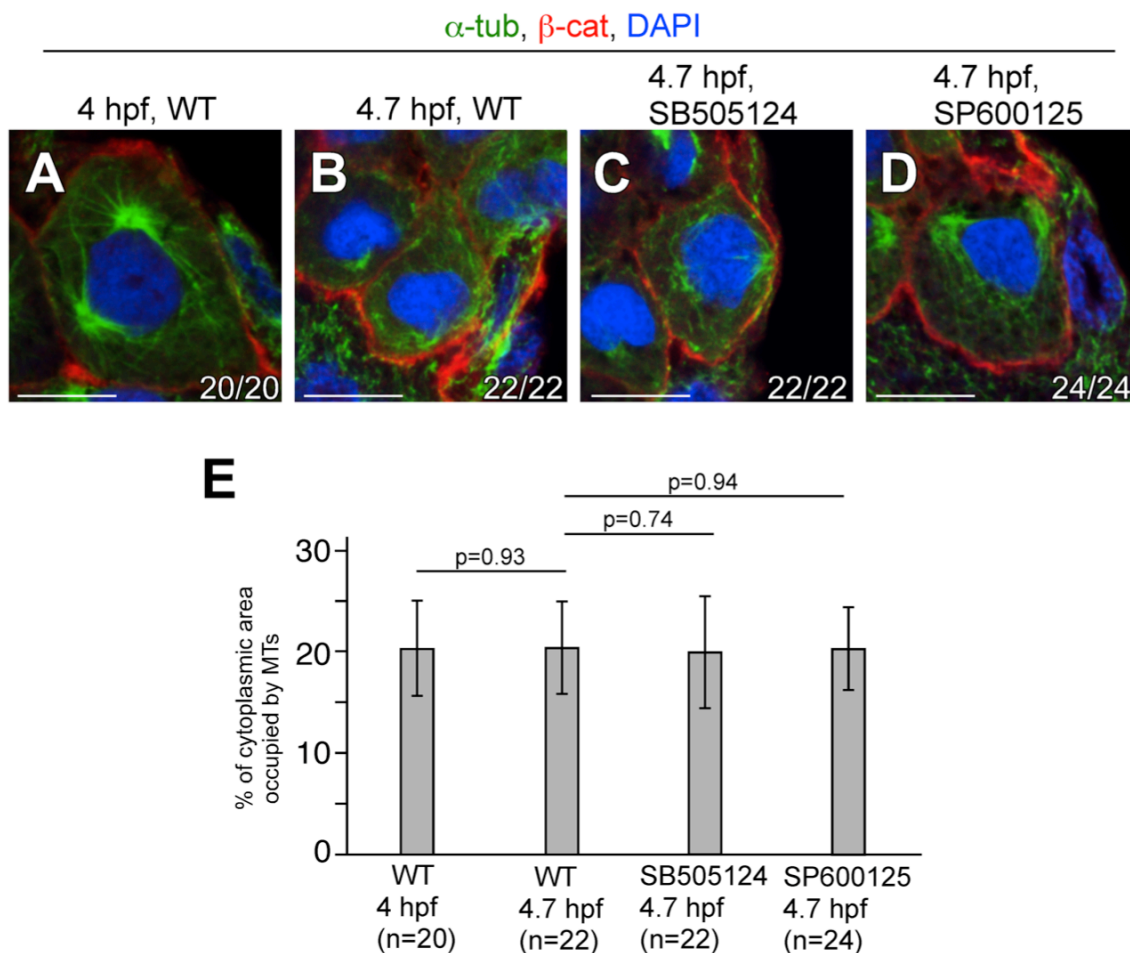

**Figure S4. MT formation was not affected by inhibition of Nodal or JNK signaling**

(A-D) Cross sections of WT, SB505124-, and SP600125-treated embryos; MTs, cell membrane, and nuclei were visualized by  $\alpha$ -tubulin ( $\alpha$ -tub),  $\beta$ -cat, and DAPI staining, respectively at 4.0 or 4.7 hpf. Number of nuclei examined is shown at the lower right corner of each panel. Scale bars: 10  $\mu$ m. (E) Percentage of cytoplasmic area occupied by MTs in LMCs of WT, SB505124-, and SP600125-treated embryos.

## Figure S5

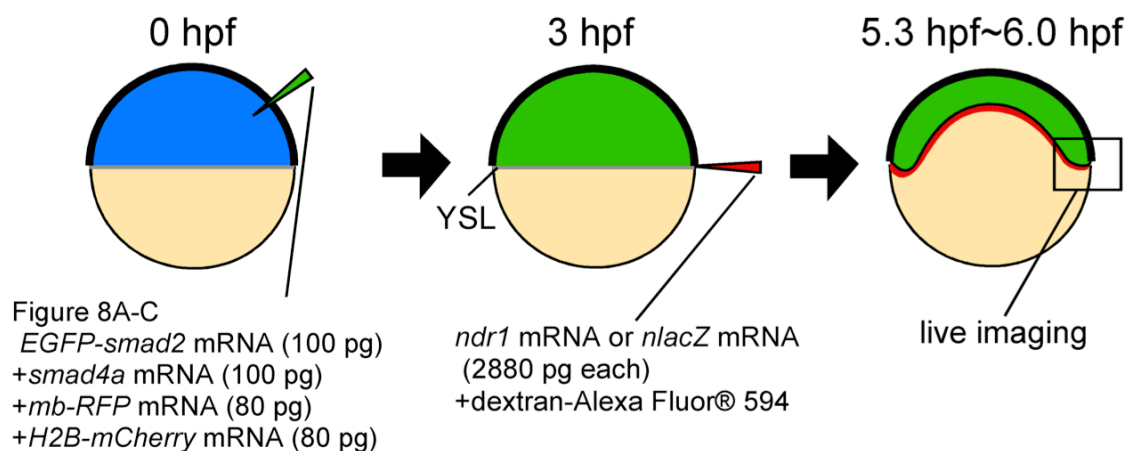

### Figure S5. Experimental design of work presented in Figure 8

A mixture of *EGFP-smad2*, *smad4a*, *mb-RFP*, and *H2B-mCherry* mRNAs was injected into WT embryos at the one-cell stage. At 3 hpf, *ndr1* or *nlacZ* mRNA was injected with dextran-Alexa Fluor® 594 into the YSL, and confocal live images were captured at 5.3-6.0 hpf.

### Table S1. Primer sequences used for quantitative real-time PCR

[Click here to Download Table S1](#)

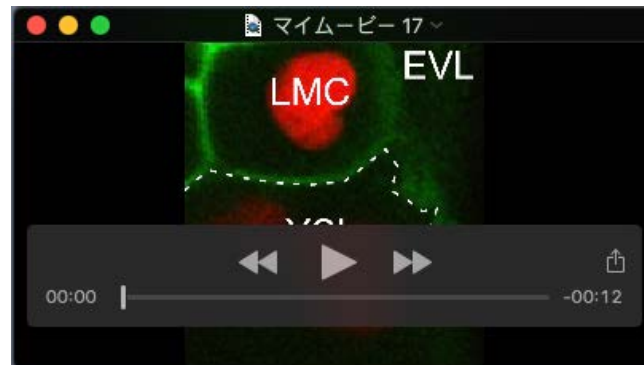

### Movie 1

Time-lapse image of the nucleus in LMC between 4.0 and 4.7 hpf. A white dotted line indicate the boundary between the blastoderm and the YSL. Thick white lines indicate DNBs.

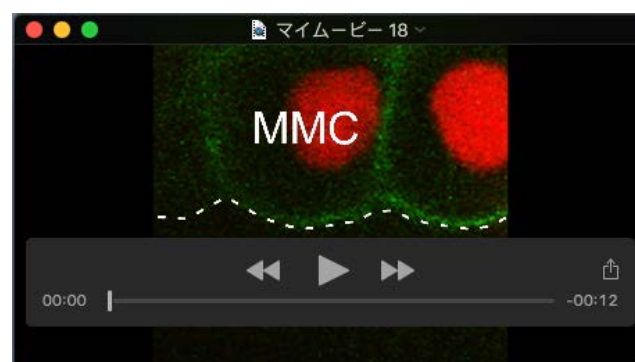

### Movie 2

Time-lapse image of the nucleus in MMC between 4.0 and 4.7 hpf. A white dotted line indicate the boundary between the blastoderm and the YSL. Thick white lines indicate DNBs.
